# Supplementary material for: Enhancing the mechanical strength and toughness of epoxy resins with linear POSS nano-modifiers
Source: Royal Society of Chemistry journal article supplement (doi:10.1039/d1na00757b), 2022-01-01
Supplement: d1na00757b1.pdf [file d1na00757b1.pdf]

Supplementary Material

## Enhancing the mechanical strength and toughness of epoxy resins with linear POSS nano modifiers

*Hong Chi,<sup>a</sup> Guocheng Zhang,<sup>a</sup> Ning Wang,<sup>a</sup> Yaoguang Wang,<sup>\*a</sup> Tianduo Li<sup>a</sup>, FuKe Wang<sup>\*b</sup>, Chen Ye<sup>c</sup>*

a. Shandong Provincial Key Laboratory of Molecular Engineering, School of Chemistry of Chemical Engineering, Qilu University of Technology (Shandong Academy of Sciences), Jinan, China 250353. Email: wangyaoguang@qlu.edu.cn

b. Polymeric Materials Department, Institute of Materials Research and Engineering, Agency for Science, Technology and Research (A\*STAR), 2 Fusionopolis Way, #08-03 Innovis, Singapore 138634. Email: wangf@imre.a-star.edu.sg

c. School of Chemistry and Chemical Engineering, University of Jinan, No. 336, West Road of Nan Xinzhuang, China 250022.

### Materials

Diglycidyl ether resin (DER332) with an epoxy equivalent weight (the weight of resin containing 1 equiv of epoxy functional group) of 171–175 g per equivalent was purchased from Dow Chemicals (USA). 9,9-Bis(4-hydroxyphenyl)fluorene (98%) was provided by TCI. A mixture (denoted as LC100) of 3,5-diethyltoluene-2,4-diamine (75–81 wt%), and 3,5-diethyltoluene-2,6-diamine (18–20 wt%) was purchased from Ethacure. Allyl glycidyl ether (99%), dichloromethylsilane (99%), Pt(dvs),

tetrabutylammoniumbromide (TBAB), triethylamine (99%) and trimethoxyphenylsilane (98%) were from Sigma-Aldrich. All solvents were of AR grade. Isopropanol (IPA), tetrahydrofuran (THF) and methanol were provided by J. T. Baker. THF and toluene was distilled before use.

### **Synthesis of diglycidyloxypropyl POSS (G-POSS)**

In a typical reaction, phenyltrimethoxysilane (242 mmol, 48.0 g) was added dropwise to a mixture of sodium hydroxide (160 mmol, 6.4 g), water (278 mmol, 5.0 g) and 2-propanol (240 mL). The mixture was stirred for 4 h with refluxing, and then left at room temperature for one day. The precipitate was filtered and washed with IPA followed by drying in vacuum at 70 °C for 5 h. A mixture of this precipitate (11.6 g), triethylamine (30 mmol, 3.0 g) and THF (100 mL) were added to a 250 mL flask and put into an ice-water bath. After cooling down, dichloromethylsilane (30 mmol, 3.4 g) was added dropwise. The mixture was then stirred at room temperature for 12 h. After removing the precipitate by centrifuge, the filtrate was evaporated to give white solid. The solid was washed with methanol to give 3,13-dihydrooctaphenyl POSS (7.1 g, yield 20 %). <sup>1</sup>H NMR (400 MHz, CDCl<sub>3</sub>, δ ppm): 7.55-7.16 (m, 40H). 4.97 (q, 2H), 0.36 (d, 6H), <sup>13</sup>C NMR (100 MHz, CDCl<sub>3</sub>, δ ppm): 134.47, 134.34, 131.24, 132.02, 131.18, 131.12, 130.88, 130.81, 128.23, 128.05, 1.03, <sup>29</sup>Si-NMR (80 MHz, CDCl<sub>3</sub>, δ ppm): 79.3, 79.1, 77.8, 32.8.

6.0 g of 3,13-dihydrooctaphenyl POSS product prepared above was placed inside a 100 mL flask and added with allyl glycidyl ether (2.5 g) and anhydrous THF (50 mL). The system was purged for half an hour using highly pure argon and then 3 drops of Pt(dvs) was added. The mixture was then reflux at 65 °C for 36 h to ensure that

hydrosilylation was completed. The solvent and excess allyl glycidyl ether was removed under reduced pressure to afford the diglycidyloxypropyl POSS solids (denoted as G-POSS in Scheme 1) with the yield of 95%. <sup>1</sup>H NMR (ppm, CDCl<sub>3</sub>): 0.30 (s, 3H), 0.747 (t, 2H), 1.69 (m, 2H), 2.45 and 2.66 (m, 2H) 2.97 (m, 1H), 3.17 and 3.47 (m, 2H), 3.34 (m, 2H). MALDI-TOF (Product + Na<sup>+</sup>): 1404.2 Da (calculated: 1403.2 Da).

## Methods

NMR measurements were carried out on a Bruker 400 NMR spectrometer. MALDI-TOF-MS experiment was carried out on an Autoflex III TOF/TOF equipped with a smart beam pulsed nitrogen laser ( $\lambda = 337$  nm; pulse width = 3 ns). Dihydroxybenzoic acid was used as the matrix with THF as the solvent. Molecular weights were estimated by Gel permeation chromatography (GPC) on a Waters 2690 Separations Module with a Waters 410 Differential Refractometer. HPLC grade THF was used as the eluent at a flow rate of 1.0 mL/min, and the column system was calibrated by standard polystyrene in THF. Thermal gravimetric analysis (TGA) was performed on a TA Instruments Q500 thermal gravimetric analyzer. Measurements were conducted in nitrogen atmosphere from ambient temperature to 700 °C with a heating rate of 20 °C/min. Differential scanning calorimetric (DSC) measurements were performed on a TA Instruments Q100 Calorimeter. A heating rate of 20 °C/min was used. Glass transition temperature ( $T_g$ ) was taken as the midpoint of the heat capacity change as identified by the change in the slopes. TA Instruments DMA Q800 dynamic mechanical analyzer (DMA) was used to evaluate the viscoelastic mechanical performance of the polymer under dynamic loadings. The frequency was set to 1Hz and temperature ramped at 3.00 °C/min from room temperature to

240 °C. The  $T_g$  was determined from the peak of the Tan delta versus temperature plot. ASTM D 638 was applied. JEOL JSM-7600F FESEM was used to examine the fracture surface of the polymer after the tensile test. JEOL-2100 TEM was used to observe the morphology of the doped hybrid polymers. The samples were cut using a Lecia Ultracut UCT ultramicrotome and placed on carbon coated copper grids.

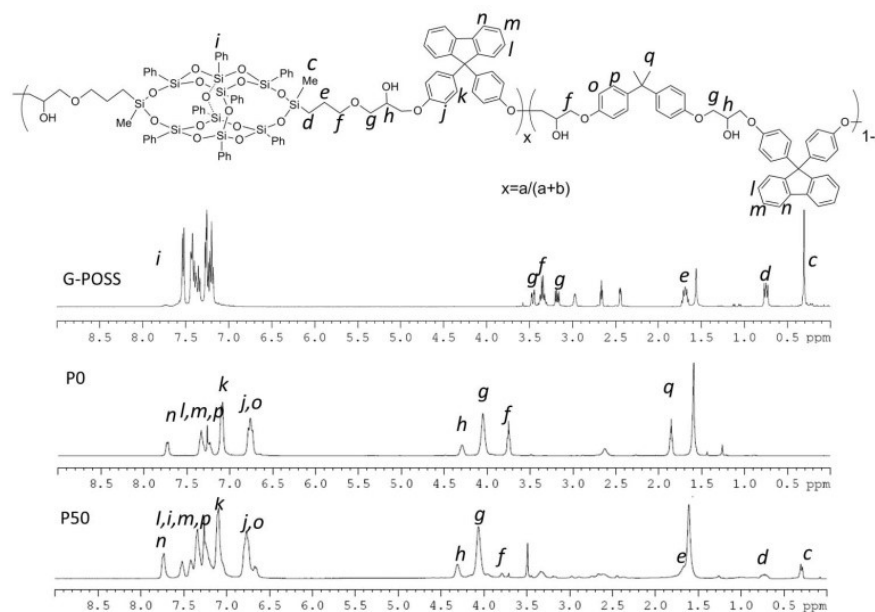

**Figure S1.** Typical  $^1\text{H}$ -NMR spectra of G-POSS, P0 and P50.

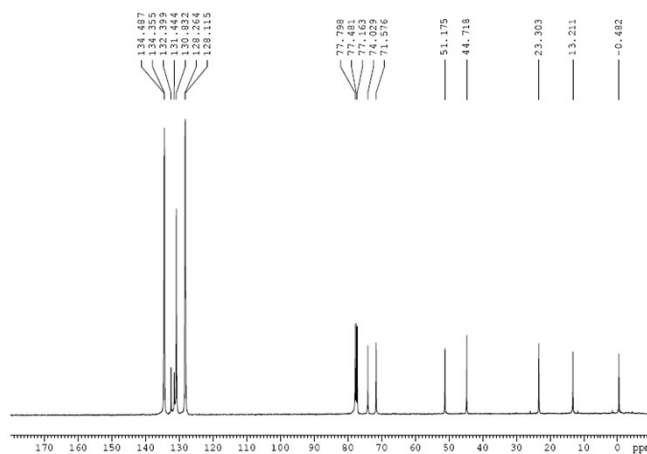

**Figure S2.**  $^{13}\text{C}$ -NMR of G-POSS.

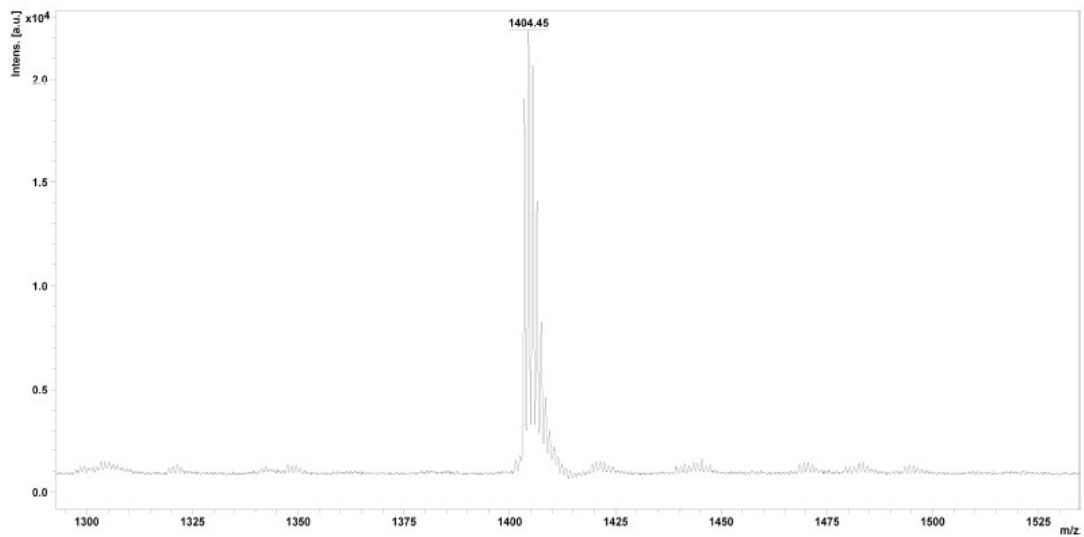

**Figure S3.** Mw of G-POSS+Na<sup>+</sup> from MALDI-TOF.

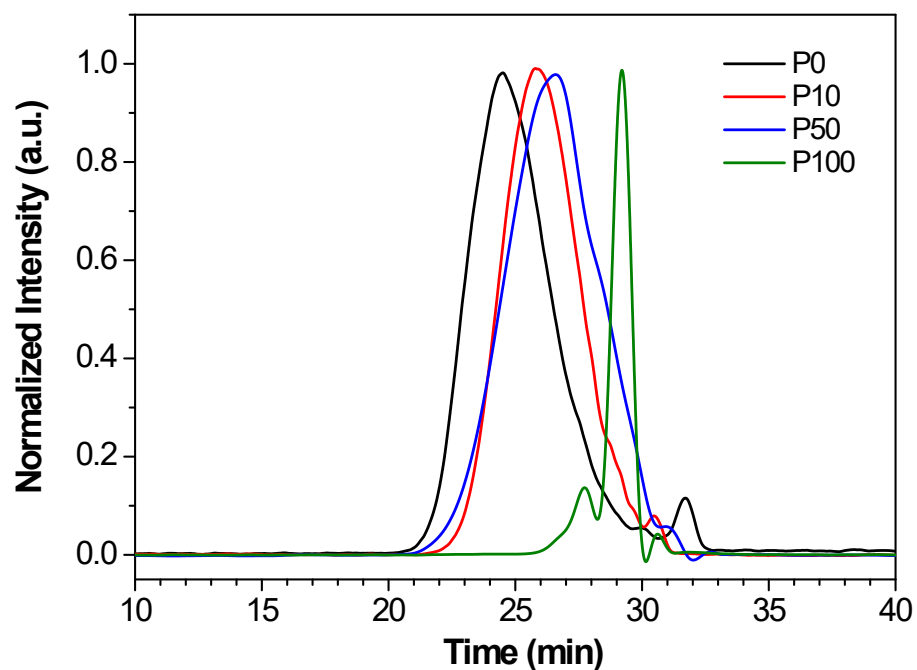

**GPC Results (P0)**

|   | Mn    | Mw    | MP    | Mz    | Mz+1  | Polydispersity | Retention Time (min) |
|---|-------|-------|-------|-------|-------|----------------|----------------------|
| 1 | 15316 | 31235 | 28150 | 55540 | 89931 | 2.039409       | 24.445               |

**GPC Results (P10)**

|   | Mn   | Mw    | MP    | Mz    | Mz+1  | Polydispersity | Retention Time (min) |
|---|------|-------|-------|-------|-------|----------------|----------------------|
| 1 | 8086 | 15488 | 13251 | 25214 | 37135 | 1.915362       | 25.889               |

**GPC Results (P50)**

|   | Mn   | Mw    | MP    | Mz    | Mz+1  | Polydispersity | Retention Time (min) |
|---|------|-------|-------|-------|-------|----------------|----------------------|
| 1 | 8710 | 16200 | 12934 | 26662 | 40017 | 1.859927       | 25.937               |

**GPC Results (P100)**

|   | Mn   | Mw   | MP   | Mz   | Mz+1 | Polydispersity | Retention Time (min) |
|---|------|------|------|------|------|----------------|----------------------|
| 1 | 2447 | 2872 | 2590 | 3650 | 4931 | 1.173287       | 28.998               |

**Table S1.** The molecular weight and polydispersity of the resultant nano modifiers.
